# Supplementary material for: Body-Mass Index and Pancreatic Cancer Incidence: A Pooled Analysis of Nine Population-Based Cohort Studies With More Than 340,000 Japanese Subjects
Source: PubMed Central journal article supplement (PMC5911675; doi:10.2188/jea.je20160193), 2018-05-05
Supplement: je-28-245-s001.pdf [file je-28-245-s001.pdf]

**eTable 1.** Details of the study method in each study

| <b>Study</b> | <b>Variables used in data linkage</b>                                | <b>Censoring date</b>                                                                             | <b>Methods to obtain information on cancer incidence</b>          |
|--------------|----------------------------------------------------------------------|---------------------------------------------------------------------------------------------------|-------------------------------------------------------------------|
| JPHC-I       | First and last names, sex, date of birth, and address                | Date of death, date of emigration, or date of last follow-up, whichever comes first.              | Local cancer registries or direct access to major local hospitals |
| JPHC-II      | First and last names, sex, date of birth, and address                | Date of death, date of emigration, or date of last follow-up, whichever comes first.              | Local cancer registries or direct access to major local hospitals |
| JACC         | First and last names, sex, date of birth, and address                | Date of death or date of emigration                                                               | Local cancer registries or direct access to major local hospitals |
| MIYAGI-I     | First and last names, sex, date of birth, date of death, and address | Date of death or date of emigration                                                               | Local cancer registry                                             |
| MIYAGI-II    | First and last names, sex, date of birth, date of death, and address | Date of death or date of emigration                                                               | Local cancer registry                                             |
| AICHI        | First and last names, sex, date of birth, and address                | Date of emigration                                                                                | Local cancer registry                                             |
| OSAKA        | First and last names, sex, date of birth, and address                | Date of death, date of emigration, or date of the end of the study period, whichever comes first. | Local cancer registries                                           |
| TAKAYAMA     | First and last names, date of birth, and address                     | Date of death or date of emigration                                                               | Local cancer registries or direct access to major local hospitals |
| OHSAKI       | First and last names, sex, date of birth, and address                | Date of death or date of emigration                                                               | Local cancer registry                                             |

AICHI, Aichi Cohort Study; JACC, The Japan Collaborative Cohort Study; JPHC, Japan Public Health Center-based prospective Study; MIYAGI, The Miyagi Cohort Study; OHSAKI, Ohsaki Cohort Study.

**eTable 2.** Hazard ratios (HR) and 95% confidence intervals (CI) for pancreatic cancer risk according to category of BMI at baseline stratified by smoking status among males

| Smoking status |                          | Categories of BMI at baseline (kg/m <sup>2</sup> ) |                         |                  |           |                  |                  |                           |
|----------------|--------------------------|----------------------------------------------------|-------------------------|------------------|-----------|------------------|------------------|---------------------------|
|                |                          | <19                                                | 19 to <21               | 21 to <23        | 23 to <25 | 25 to <27        | 27 to <30        | ≥30                       |
| Never          | Number of subjects (N)   | 1,384                                              | 4,177                   | 7,299            | 8,081     | 4,963            | 2,569            | 620                       |
|                | Person-years (N)         | 16,272.4                                           | 55,162.6                | 99,948.9         | 112,181.3 | 70,099.5         | 35,966.0         | 8,288.7                   |
|                | Number of cases (N)      | 6                                                  | 19                      | 35               | 27        | 14               | 14               | 2                         |
|                | Crude rate (per 100,000) | 36.87                                              | 34.44                   | 35.02            | 24.07     | 19.97            | 38.93            | 24.13                     |
|                | HR overall               | 1.58 (0.54–4.61)                                   | 1.23 (0.67–2.27)        | 1.37 (0.81–2.30) | Reference | 1.28 (0.62–2.67) | 1.67 (0.82–3.38) | <b>11.21 (1.87–67.35)</b> |
|                |                          |                                                    |                         |                  |           |                  |                  |                           |
| Ever           | Number of subjects (N)   | 7,122                                              | 19,837                  | 30,242           | 28,103    | 15,186           | 7,207            | 1,795                     |
|                | Person-years (N)         | 79,282.6                                           | 251,781.6               | 393,602.8        | 375,495.1 | 204,026.5        | 98,053.7         | 23,170.1                  |
|                | Number of cases (N)      | 48                                                 | 144                     | 171              | 148       | 69               | 34               | 15                        |
|                | Crude rate (per 100,000) | 60.54                                              | 57.19                   | 43.44            | 39.41     | 33.82            | 34.67            | 64.74                     |
|                | HR overall               | 1.31 (0.84–2.05)                                   | <b>1.35 (1.07–1.70)</b> | 1.05 (0.84–1.31) | Reference | 0.92 (0.69–1.23) | 1.05 (0.72–1.54) | <b>2.02 (1.14–3.58)</b>   |
|                |                          |                                                    |                         |                  |           |                  |                  |                           |

BMI, body mass index.

HRs adjusted for age, area (within each study for JPHC and JACC), drinking (never, <1 week/day, current <23 g/day, 23 to <46 g/day, 46 to <69 g/day, ≥69 g/day, or unknown), and history of diabetes (yes, no, or unknown). HRs values in bold show statistical significance.

**eTable 3.** Hazard ratios (HR) and 95% confidence intervals (CI) for pancreatic cancer risk according to category of BMI change among males

|                                            | Categories of BMI change (BMI at baseline - BMI during early adulthood, (kg/m <sup>2</sup> )) |                  |           |                  |                         | Trend<br>(per 1 kg/m <sup>2</sup> ) | Trend <i>P</i> | Heterogeneity [ <i>P</i> , <i>I</i> <sup>2</sup> (%)] |                          |
|--------------------------------------------|-----------------------------------------------------------------------------------------------|------------------|-----------|------------------|-------------------------|-------------------------------------|----------------|-------------------------------------------------------|--------------------------|
|                                            | <-4                                                                                           | -4 to <-2        | -2 to <2  | 2 to <5          | ≥5                      |                                     |                | For trend                                             | For the highest category |
| Number of subjects ( <i>N</i> )            | 8,467                                                                                         | 13,181           | 44,052    | 18,799           | 5,624                   |                                     |                |                                                       |                          |
| Person-years ( <i>N</i> )                  | 102,871.1                                                                                     | 166,715.5        | 583,544.9 | 250,563.5        | 76,406.9                |                                     |                |                                                       |                          |
| Number of cases ( <i>N</i> )               | 41                                                                                            | 88               | 254       | 103              | 15                      |                                     |                |                                                       |                          |
| Crude rate (per 100,000)                   | 39.86                                                                                         | 52.78            | 43.53     | 41.11            | 19.63                   |                                     |                |                                                       |                          |
| <b>HR (model 1) overall</b>                | 0.91 (0.65–1.27)                                                                              | 1.11 (0.86–1.42) | Reference | 0.97 (0.69–1.36) | <b>0.54 (0.31–0.94)</b> | 0.98 (0.92–1.04)                    | 0.407          | <i>P</i> = 0.005, 73.2                                | <i>P</i> = 0.356, 7.4    |
| <b>HR (model 2) overall</b>                | 0.89 (0.63–1.25)                                                                              | 1.05 (0.82–1.35) | Reference | 0.96 (0.69–1.33) | <b>0.55 (0.32–0.96)</b> | 0.98 (0.92–1.04)                    | 0.444          | <i>P</i> = 0.010, 69.8                                | <i>P</i> = 0.363, 6.0    |
| <b>HR (model 2)† overall</b>               | 0.98 (0.68–1.40)                                                                              | 1.09 (0.85–1.41) | Reference | 0.90 (0.62–1.30) | <b>0.46 (0.27–0.79)</b> | 0.95 (0.90–1.01)                    | 0.112          | <i>P</i> = 0.045, 58.9                                | <i>P</i> = 0.982, 0      |
| <b>HR (model 1) excluding early cases</b>  | 0.85 (0.59–1.24)                                                                              | 1.10 (0.85–1.44) | Reference | 0.96 (0.68–1.34) | 0.56 (0.26–1.17)        | 0.98 (0.92–1.04)                    | 0.484          | <i>P</i> = 0.005, 73.1                                | <i>P</i> = 0.171, 40.2   |
| <b>HR (model 2) excluding early cases</b>  | 0.86 (0.59–1.26)                                                                              | 1.03 (0.79–1.36) | Reference | 0.94 (0.69–1.29) | 0.57 (0.27–1.19)        | 0.98 (0.92–1.04)                    | 0.501          | <i>P</i> = 0.010, 69.7                                | <i>P</i> = 0.172, 39.9   |
| <b>HR (model 2)† excluding early cases</b> | 0.92 (0.62–1.37)                                                                              | 1.02 (0.78–1.35) | Reference | 0.94 (0.67–1.30) | <b>0.47 (0.26–0.84)</b> | 0.96 (0.90–1.03)                    | 0.235          | <i>P</i> = 0.025, 64.0                                | <i>P</i> = 0.943, 0      |

BMI, body mass index.

Model 1 adjusted for age and area (within each study for JPHC and JACC). Model 2 adjusted for age, area, smoking (pack-years[PY]=0, 0<PY≤20, >20, or unknown), drinking (never, <1 week/day, current <23 g/day, 23 to <46 g/day, 46 to <69 g/day, ≥69 g/day, or unknown), and history of diabetes (yes, no, or unknown). HRs values in bold show statistical significance. BMI during early adulthood was evaluated only in JPHC2, JACC, Takayama, Miyazaki, and Ohsaki.

† HRs were additionally adjusted for BMI during early adulthood (continuous).

**eTable 4.** Hazard ratios (HR) and 95% confidence intervals (CI) for pancreatic cancer risk according to BMI during early adulthood stratified by BMI at baseline among males

|                                                      | BMI at baseline (kg/m <sup>2</sup> ) |                                               |                                    |                                        |                                    |                                        |
|------------------------------------------------------|--------------------------------------|-----------------------------------------------|------------------------------------|----------------------------------------|------------------------------------|----------------------------------------|
|                                                      | <21                                  |                                               | 21 to <25                          |                                        | ≥25                                |                                        |
|                                                      | Cases / Subjects<br>(Person-years)   | HR (95% CI)<br>[HR (95%CI)†]                  | Cases / Subjects<br>(Person-years) | HR (95% CI)<br>[HR (95%CI)†]           | Cases / Subjects<br>(Person-years) | HR (95% CI)<br>[HR (95%CI)†]           |
| <b>BMI during early adulthood (kg/m<sup>2</sup>)</b> |                                      |                                               |                                    |                                        |                                    |                                        |
| <21                                                  | 75 / 11,331<br>(148,527.65)          | <b>1.38 (1.00–1.90)</b><br>[1.39 (0.92–2.11)] | 58 / 16,155<br>(220,156.84)        | 0.73 (0.49–1.09)<br>[0.67 (0.39–1.15)] | 10 / 4,108<br>(56,404.66)          | 0.55 (0.27–1.12)<br>[0.61 (0.29–1.27)] |
| 21 to <25                                            | 69 / 8,620<br>(102,197.87)           | 1.09 (0.79–1.52)<br>[1.08 (0.69–1.68)]        | 160 / 27,092<br>(358,664.09)       | Reference                              | 56 / 13,112<br>(177,788.43)        | 0.84 (0.59–1.19)<br>[0.79 (0.52–1.18)] |
| ≥25                                                  | 4 / 674<br>(6,680.21)                | 1.83 (0.67–5.03)<br>[2.36 (0.85–6.51)]        | 47 / 4,940<br>(58,068.39)          | 1.32 (0.87–2.02)<br>[1.31 (0.86–1.98)] | 22 / 4,008<br>(50,775.56)          | 1.00 (0.64–1.56)<br>[1.09 (0.68–1.76)] |

BMI, body mass index.

HRs values in bold show statistical significance. HRs adjusted for age, area, smoking (pack-years[PY]=0, 0<PY≤20, >20, or unknown), drinking (never, <1 week/day, current <23 g/day, 23 to <46 g/day, 46 to <69 g/day, ≥69 g/day, or unknown), and history of diabetes (yes, no, or unknown).

† HRs excluding early cases

**eTable 5.** Distribution of BMI during early adulthood in each category of BMI change among males

| Categories of BMI during early adulthood (kg/m <sup>2</sup> ) | Categories of BMI change (BMI at baseline - BMI during early adulthood, (kg/m <sup>2</sup> )) |               |               |                |               |               |
|---------------------------------------------------------------|-----------------------------------------------------------------------------------------------|---------------|---------------|----------------|---------------|---------------|
|                                                               | ALL                                                                                           | <-4           | -4 to <-2     | -2 to <2       | 2 to <5       | ≥5            |
| <19                                                           | 7,339 (8.1%)                                                                                  | 1,045 (12.3%) | 659 (5.0%)    | 2,550 (5.8%)   | 1,848 (9.8%)  | 1,237 (22.0%) |
| 19 to <21                                                     | 24,334 (27.0%)                                                                                | 2,362 (27.9%) | 3,033 (23.0%) | 11,455 (26.0%) | 5,627 (29.9%) | 1,857 (33.0%) |
| 21 to <23                                                     | 30,249 (33.6%)                                                                                | 2,346 (27.7%) | 4,655 (35.3%) | 16,363 (37.1%) | 5,581 (29.7%) | 1,304 (23.2%) |
| 23 to <25                                                     | 18,606 (20.6%)                                                                                | 1,469 (17.3%) | 3,227 (24.5%) | 9,942 (22.6%)  | 3,397 (18.1%) | 571 (10.2%)   |
| 25 to <27                                                     | 6,362 (7.1%)                                                                                  | 684 (8.1%)    | 1,122 (8.5%)  | 2,809 (6.4%)   | 1,465 (7.8%)  | 282 (5.0%)    |
| 27 to <30                                                     | 2,649 (2.9%)                                                                                  | 426 (5.0%)    | 407 (3.1%)    | 826 (1.9%)     | 723 (3.8%)    | 267 (4.7%)    |
| ≥30                                                           | 584 (0.6%)                                                                                    | 135 (1.6%)    | 78 (0.6%)     | 107 (0.2%)     | 158 (0.8%)    | 106 (1.9%)    |
| <b>ALL</b>                                                    | 90,123 (100%)                                                                                 | 8,467 (100%)  | 13,181 (100%) | 44,052 (100%)  | 18,799 (100%) | 5,624 (100%)  |

BMI, body mass index.

**eTable 6.** Distribution of BMI during early adulthood in each category of BMI change among males

| Categories of BMI during early adulthood (kg/m <sup>2</sup> ) | Categories of BMI change (BMI at baseline - BMI during early adulthood, (kg/m <sup>2</sup> )) |     |           |          |         |    |
|---------------------------------------------------------------|-----------------------------------------------------------------------------------------------|-----|-----------|----------|---------|----|
|                                                               | ALL                                                                                           | <-4 | -4 to <-2 | -2 to <2 | 2 to <5 | ≥5 |
| <19                                                           | 36                                                                                            | 7   | 5         | 15       | 7       | 2  |
| 19 to <21                                                     | 107                                                                                           | 6   | 6         | 61       | 29      | 5  |
| 21 to <23                                                     | 166                                                                                           | 7   | 31        | 97       | 27      | 4  |
| 23 to <25                                                     | 119                                                                                           | 9   | 27        | 59       | 23      | 1  |
| 25 to <27                                                     | 47                                                                                            | 5   | 13        | 18       | 10      | 1  |
| 27 to <30                                                     | 22                                                                                            | 6   | 3         | 4        | 7       | 2  |
| ≥30                                                           | 4                                                                                             | 1   | 3         | 0        | 0       | 0  |

BMI, body mass index.

**eTable 7.** Hazard ratios (HR) and 95% confidence intervals (CI) for pancreatic cancer risk according to category of BMI change among females

|                                            | Categories of BMI change (BMI at baseline - BMI during early adulthood, (kg/m <sup>2</sup> )) |           |                  |                  |                  | Trend<br>(per 1 kg/m <sup>2</sup> ) | Trend <i>P</i> | Heterogeneity [ <i>P</i> , <i>I</i> <sup>2</sup> (%)] |                          |
|--------------------------------------------|-----------------------------------------------------------------------------------------------|-----------|------------------|------------------|------------------|-------------------------------------|----------------|-------------------------------------------------------|--------------------------|
|                                            | <-2                                                                                           | -2 to <2  | 2 to <5          | 5 to <8          | ≥8               |                                     |                | For trend                                             | For the highest category |
| Number of subjects ( <i>N</i> )            | 30,233                                                                                        | 39,762    | 23,748           | 6,897            | 1,753            |                                     |                |                                                       |                          |
| Person-years ( <i>N</i> )                  | 388,829.9                                                                                     | 544,533.6 | 327,601.4        | 95,363.8         | 24,671.7         |                                     |                |                                                       |                          |
| Number of cases ( <i>N</i> )               | 126                                                                                           | 141       | 95               | 30               | 7                |                                     |                |                                                       |                          |
| Crude rate (per 100,000)                   | 32.40                                                                                         | 25.89     | 29.00            | 31.46            | 28.37            |                                     |                |                                                       |                          |
| <b>HR (model 1) overall</b>                | 0.99 (0.77–1.27)                                                                              | Reference | 1.07 (0.73–1.57) | 1.24 (0.75–2.05) | 1.51 (0.32–7.07) | 1.02 (0.97–1.08)                    | 0.483          | <i>P</i> = 0.007, 71.4                                | <i>P</i> = 0.076, 68.2   |
| <b>HR (model 2) overall</b>                | 1.01 (0.78–1.30)                                                                              | Reference | 1.04 (0.71–1.54) | 1.28 (0.79–2.09) | 1.56 (0.38–6.39) | 1.02 (0.97–1.07)                    | 0.460          | <i>P</i> = 0.012, 68.8                                | <i>P</i> = 0.108, 61.3   |
| <b>HR (model 2)† overall</b>               | 0.84 (0.63–1.12)                                                                              | Reference | 1.23 (0.90–1.70) | 1.31 (0.88–1.94) | 1.41 (0.64–3.10) | 1.04 (1.00–1.08)                    | 0.080          | <i>P</i> = 0.190, 34.7                                | <i>P</i> = 0.584, 0      |
| <b>HR (model 1) excluding early cases</b>  | 0.96 (0.70–1.31)                                                                              | Reference | 1.12 (0.76–1.64) | 1.33 (0.78–2.29) | 1.73 (0.40–7.47) | 1.03 (0.98–1.09)                    | 0.295          | <i>P</i> = 0.012, 69.1                                | <i>P</i> = 0.096, 63.8   |
| <b>HR (model 2) excluding early cases</b>  | 0.99 (0.75–1.30)                                                                              | Reference | 1.10 (0.74–1.62) | 1.40 (0.82–2.39) | 1.81 (0.47–6.97) | 1.03 (0.98–1.09)                    | 0.272          | <i>P</i> = 0.017, 67.0                                | <i>P</i> = 0.126, 57.3   |
| <b>HR (model 2)† excluding early cases</b> | 0.85 (0.62–1.15)                                                                              | Reference | 1.25 (0.86–1.84) | 1.46 (0.97–2.21) | 1.64 (0.74–3.63) | <b>1.05 (1.00–1.09)</b>             | <b>0.049</b>   | <i>P</i> = 0.175, 36.9                                | <i>P</i> = 0.673, 0      |

† HRs were additionally adjusted for BMI during early adulthood (continuous).

Model 1 adjusted for age and area (within each study for JPHC and JACC). Model 2 adjusted for age, area, smoking (pack-years[PY]=0, 0<PY≤20, >20, or unknown), drinking (never, <1 week/day, current <23 g/day, ≥23 g/day, or unknown), and history of diabetes (yes, no, or unknown). HRs values in bold show statistical significance. BMI during early adulthood was evaluated only in JPHC II, JACC, Takayama, Miyazaki, and Ohsaki.

**eTable 8.** Hazard ratios (HR) and 95% confidence intervals (CI) for pancreatic cancer risk according to BMI during early adulthood stratified by BMI at baseline among females

|                                                      | BMI at baseline (kg/m <sup>2</sup> ) |                                        |                                    |                                        |                                    |                                        |
|------------------------------------------------------|--------------------------------------|----------------------------------------|------------------------------------|----------------------------------------|------------------------------------|----------------------------------------|
|                                                      | <21                                  |                                        | 21 to <25                          |                                        | ≥25                                |                                        |
|                                                      | Cases / Subjects<br>(Person-years)   | HR (95% CI)<br>[HR (95%CI)†]           | Cases / Subjects<br>(Person-years) | HR (95% CI)<br>[HR (95%CI)†]           | Cases / Subjects<br>(Person-years) | HR (95% CI)<br>[HR (95%CI)†]           |
| <b>BMI during early adulthood (kg/m<sup>2</sup>)</b> |                                      |                                        |                                    |                                        |                                    |                                        |
| <b>&lt;21</b>                                        | 35 / 14,431<br>(195,809.99)          | 0.70 (0.46–1.07)<br>[0.74 (0.41–1.33)] | 79 / 21,505<br>(295,885.72)        | 1.19 (0.76–1.86)<br>[1.25 (0.72–2.18)] | 22 / 6,643<br>(91,259.96)          | 0.98 (0.45–2.17)<br>[1.06 (0.41–2.76)] |
| <b>21 to &lt;25</b>                                  | 51 / 9,797<br>(127,095.47)           | 1.27 (0.79–2.04)<br>[1.37 (0.80–2.34)] | 93 / 23,943<br>(327,073.11)        | Reference                              | 67 / 14,536<br>(198,447.22)        | 1.19 (0.69–2.04)<br>[1.21 (0.56–2.59)] |
| <b>≥25</b>                                           | 2 / 1,005<br>(11,225.66)             | 1.05 (0.24–4.51)<br>[0.71 (0.09–5.44)] | 25 / 5,538<br>(70,223.40)          | 0.95 (0.59–1.53)<br>[0.98 (0.60–1.59)] | 24 / 4,766<br>(61,888.99)          | 1.18 (0.74–1.90)<br>[1.33 (0.81–2.19)] |

BMI, body mass index.

HRs adjusted for age, area, smoking (pack-years[PY]=0, 0<PY≤20, >20, or unknown), drinking (never, <1 week/day, current <23 g/day, ≥23 g/day, or unknown), and history of diabetes (yes, no, or unknown). HRs values in bold show statistical significance.

† HRs excluding early cases
